# Supplementary material
Source: Royal Society of Chemistry journal article supplement (doi:10.1039/d5ta05329c)
Supplement: d5ta05329c1.pdf [file d5ta05329c1.pdf]

# Mechanistic insights into the formation of N-vacancies at $sp^2$ hybridized sites in non-metal doped g- $C_3N_4$ and its potential applications in Solar to $H_2$ conversion and environmental remediation reactions

Rama Krishna Chava,<sup>\*a</sup> Annamalai Raja,<sup>a</sup> Sathish Panner Selvam,<sup>b</sup> Shanmugasundaram Kamalakannan,<sup>c</sup> and Misook Kang<sup>\*a</sup>

<sup>a</sup>Department of Chemistry, College of Natural Sciences, Yeungnam University, 280 Daehak-Ro, Gyeongsan, Gyeongbuk 38541, Republic of Korea

<sup>b</sup>Department of Electronic Engineering, Gachon University, Seongnam-si, Gyeonggi-do 13210, Republic of Korea

<sup>c</sup>Centre of Excellence in Materials and Advanced Technologies (CeMAT), Faculty of Engineering and Technology, SRM Institute of Science and Technology, Kattankulathur, 603203, Chennai, Tamil Nadu, India

## **Corresponding authors address:**

**Dr. Rama Krishna Chava:** Department of Chemistry, College of Natural Sciences, Yeungnam University, 280 Daehak-Ro, Gyeongsan, Gyeongbuk 38541, Republic of Korea.

Email: [drckrphysics@hotmail.com](mailto:drckrphysics@hotmail.com); [rama@ynu.ac.kr](mailto:rama@ynu.ac.kr)

**Prof. Misook Kang:** Department of Chemistry, College of Natural Sciences, Yeungnam University, 280 Daehak-Ro, Gyeongsan, Gyeongbuk 38541, Republic of Korea.

Email: [miskang@ynu.ac.kr](mailto:miskang@ynu.ac.kr)

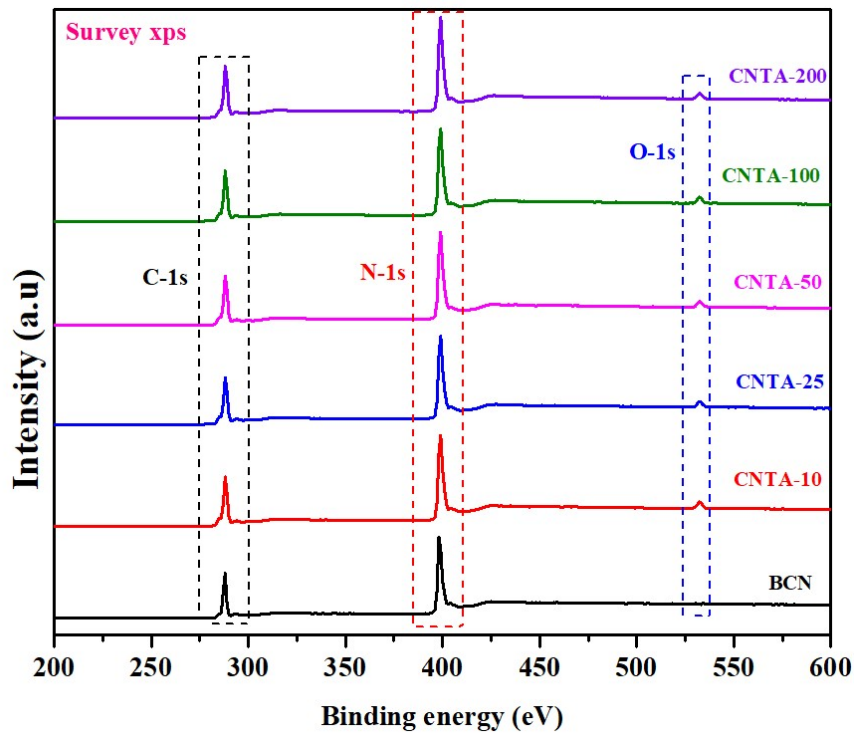

Fig. S1. XPS survey scan spectra of BCN and CNTA samples.

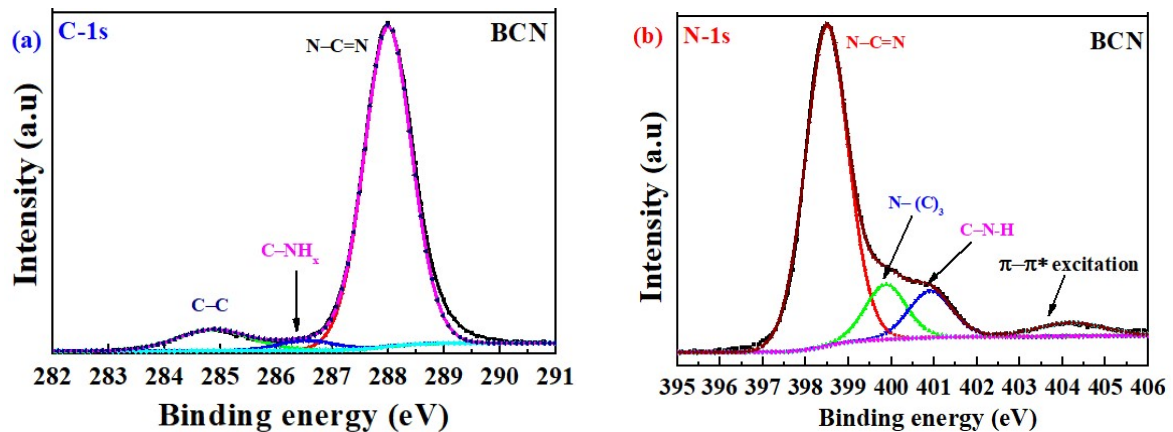

Fig. S2. High-resolution XPS spectra of BCN sample (a) C-1s displayed peaks around 284.85, 286.40 and 288.00 eV attributed to graphitic carbon in C-C or C=C sites, C-NH<sub>x</sub> (x=1 or 2), N-C=N in the aromatic rings of the g-C<sub>3</sub>N<sub>4</sub> heterocycles respectively; and (b) N-1s exhibited the peaks at 398.50, 399.85, 400.95 and 404.25 eV corresponds to sp<sup>2</sup>-hybridized nitrogen in triazine rings, N-(C)<sub>3</sub>, sp<sup>3</sup> primary nitrogen atom (N-H/NH<sub>2</sub>) and charge localization effect respectively.

Table S1. Relative atomic percentage details of C-1s, N-1s and O-1s elements in BCN and CNTA samples

| Sample   | C-1s (at %) | N-1s (at %) | O-1s (at %) | N/C   | C/N   |
|----------|-------------|-------------|-------------|-------|-------|
| BCN      | 40.65       | 59.35       | -           | 1.460 | 0.685 |
| CNTA-10  | 42.50       | 54.25       | 3.25        | 1.276 | 0.783 |
| CNTA-25  | 42.60       | 54.37       | 3.03        | 1.276 | 0.783 |
| CNTA-50  | 42.47       | 54.55       | 2.99        | 1.284 | 0.778 |
| CNTA-100 | 42.22       | 54.81       | 2.97        | 1.298 | 0.770 |
| CNTA-200 | 41.97       | 55.27       | 2.77        | 1.317 | 0.759 |

Table S2. The ratio of peak areas for BCN and CNTA-100 based on XPS N-1s results.

| Sample   | N-1s (at %) |                    |                   |
|----------|-------------|--------------------|-------------------|
|          | C=N-C       | N-(C) <sub>3</sub> | C-NH <sub>x</sub> |
| BCN      | 63.8%       | 27.4%              | 8.8%              |
| CNTA-100 | 48.5%       | 35.7%              | 15.8%             |

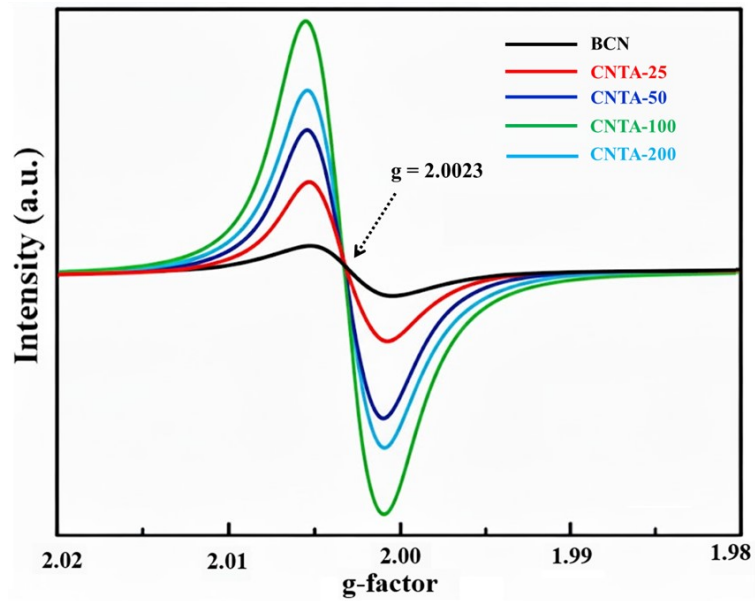

Fig. S3. DPPH calibrated electron paramagnetic resonance (EPR) spectra of BCN and CNTA samples.

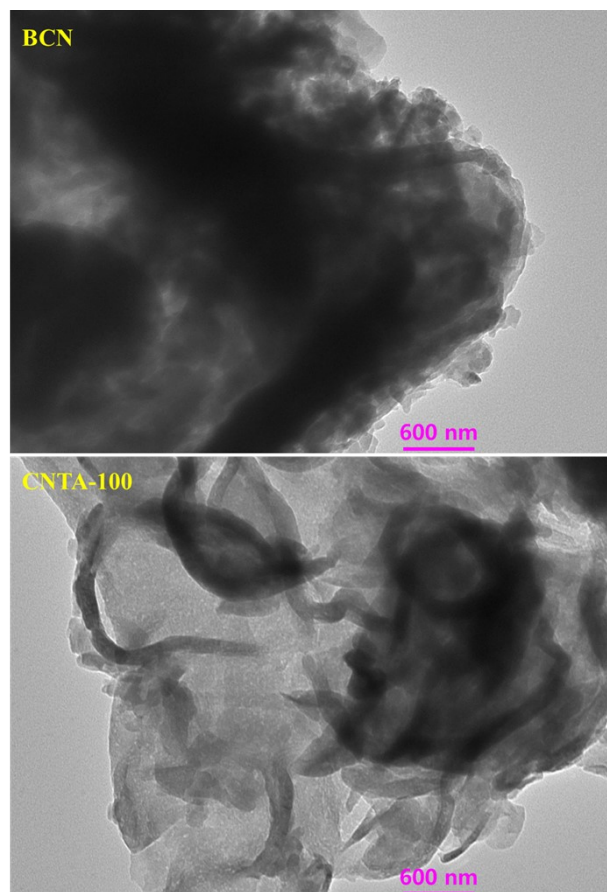

Fig. S4. High magnification TEM images of BCN and CNTA-100 photocatalyst samples to highlight the formation of pores on the surface of  $g\text{-C}_3\text{N}_4$ .

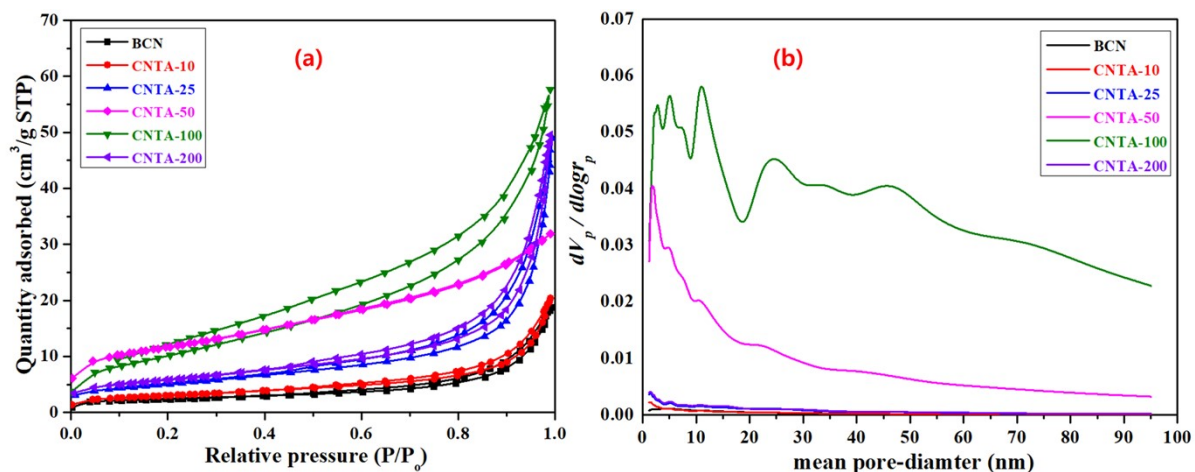

Fig. S5. N<sub>2</sub> adsorption-desorption isotherms (a) and pore-size distribution curves (b) of BCN and CNTA samples.

Table S3. BET surface area and pore-size distribution parameters for BCN and CNTA samples

| Sample   | BET surface area<br>(m <sup>2</sup> /g) | mean pore diameter<br>(nm) | pore volume<br>(cm <sup>3</sup> /g) |
|----------|-----------------------------------------|----------------------------|-------------------------------------|
| BCN      | 10.41                                   | 4.92                       | 0.012                               |
| CNTA-10  | 10.51                                   | 4.93                       | 0.013                               |
| CNTA-25  | 17.63                                   | 15.50                      | 0.068                               |
| CNTA-50  | 19.98                                   | 15.10                      | 0.075                               |
| CNTA-100 | 23.80                                   | 15.17                      | 0.075                               |
| CNTA-200 | 17.86                                   | 4.96                       | 0.022                               |

Table S4. Comparison of photocatalytic H<sub>2</sub> evolution activity of the CNTA-100 sample with the recent non-metal doped and defects engineered g-C<sub>3</sub>N<sub>4</sub> photocatalysts.

| Catalyst                                                           | Light source                  | H <sub>2</sub> evolution rate (μmol.g <sup>-1</sup> .h <sup>-1</sup> ) | Apparent Quantum Yield (AQY%) | Ref. |
|--------------------------------------------------------------------|-------------------------------|------------------------------------------------------------------------|-------------------------------|------|
| C, O- doped g-C <sub>3</sub> N <sub>4</sub>                        | 300 W Xe lamp<br>200-2500 nm  | 563.87                                                                 | ---                           | [1]  |
| S-doped g-C <sub>3</sub> N <sub>4</sub>                            | 300 W Xe lamp<br>(λ ≥ 420 nm) | 133.12                                                                 | ---                           | [2]  |
| g-C <sub>3</sub> N <sub>4</sub> with N <sub>v</sub>                | 300 W Xe lamp<br>(λ ≥ 420 nm) | 2664.47                                                                | 9.8%                          | [3]  |
| C and O- co-doped g-C <sub>3</sub> N <sub>4</sub>                  | 300 W Xe lamp<br>(λ ≥ 420 nm) | 2595.4                                                                 | 16.6%                         | [4]  |
| N-defected g-C <sub>3</sub> N <sub>4</sub>                         | 300 W Xe lamp<br>(λ ≥ 400 nm) | 316.0                                                                  | 5.12%                         | [5]  |
| g-C <sub>3</sub> N <sub>4</sub> with N <sub>3C</sub> vacancies     | 300 W Xe lamp<br>(λ ≥ 420 nm) | 545.0                                                                  | 4.4%                          | [6]  |
| P-doped g-C <sub>3</sub> N <sub>4</sub>                            | 300 W Xe lamp<br>(λ ≥ 420 nm) | 916.2                                                                  | 6.52%                         | [7]  |
| hollow tubular g-C <sub>3</sub> N <sub>4</sub> with N <sub>v</sub> | 300 W Xe lamp<br>(λ ≥ 420 nm) | 2664.4                                                                 | 9.8%                          | [8]  |
| S-doped N-deficient g-C <sub>3</sub> N <sub>4</sub>                | 300 W Xe lamp<br>(λ ≥ 420 nm) | 1613.5                                                                 | 14.3%                         | [9]  |
| S-doped C-vacancy g-C <sub>3</sub> N <sub>4</sub>                  | 300 W Xe lamp<br>(λ ≥ 420 nm) | 2378                                                                   | 5.70%                         | [10] |
| Dual defect-rich g-C <sub>3</sub> N <sub>4</sub>                   | 300 W Xe lamp<br>(λ ≥ 420 nm) | 1959                                                                   | 0.21%                         | [11] |
| N-deficient g-C <sub>3</sub> N <sub>4</sub>                        | 300 W Xe lamp<br>(λ ≥ 420 nm) | 1962                                                                   | ---                           | [12] |
| S-doped g-C <sub>3</sub> N <sub>4</sub>                            | 300 W Xe lamp<br>(λ ≥ 420 nm) | 1148                                                                   | ---                           | [13] |

|                                                                   |                                                                   |             |             |                     |
|-------------------------------------------------------------------|-------------------------------------------------------------------|-------------|-------------|---------------------|
| Carbon defective g-C <sub>3</sub> N <sub>4</sub>                  | 300 W Xe lamp<br>( $\lambda \geq 420$ nm)                         | 1534        | 2.87%       | [14]                |
| B-doped g-C <sub>3</sub> N <sub>4</sub>                           | 300 W Xe lamp<br>( $\lambda \geq 420$ nm)                         | 1639.3      | ---         | [15]                |
| C- and N-vacancies in g-C <sub>3</sub> N <sub>4</sub>             | 300 W Xe lamp<br>( $\lambda \geq 420$ nm)                         | 400         | 7.6%        | [16]                |
| Nitrogen-deficient g-C <sub>3</sub> N <sub>4</sub>                | 300 W Xe lamp<br>( $\lambda \geq 420$ nm)                         | 1664        | 1.25%       | [17]                |
| F-doped g-C <sub>3</sub> N <sub>4</sub>                           | 300 W Xe lamp<br>( $\lambda \geq 420$ nm)                         | 83.89       | 0.016%      | [18]                |
| S, P, O-doped gC <sub>3</sub> N <sub>4</sub>                      | 300 W Xe lamp<br>( $\lambda \geq 420$ nm)                         | 2480        | ---         | [19]                |
| C-doped gC <sub>3</sub> N <sub>4</sub>                            | 300 W Xe lamp<br>( $\lambda \geq 420$ nm)                         | 5643        | 1.41%       | [20]                |
| <b>C, O-doped g-C<sub>3</sub>N<sub>4</sub> with N<sub>v</sub></b> | <b>150 W Xe lamp</b><br><b>(<math>\lambda \geq 420</math> nm)</b> | <b>1850</b> | <b>7.1%</b> | <b>Present work</b> |

-----

\*The H<sub>2</sub> evolution rates are listed for reference but are not directly comparable due to variations in experimental conditions, particularly light source intensity. Apparent Quantum Efficiency (AQE) is the recommended metric for comparison in the present study.

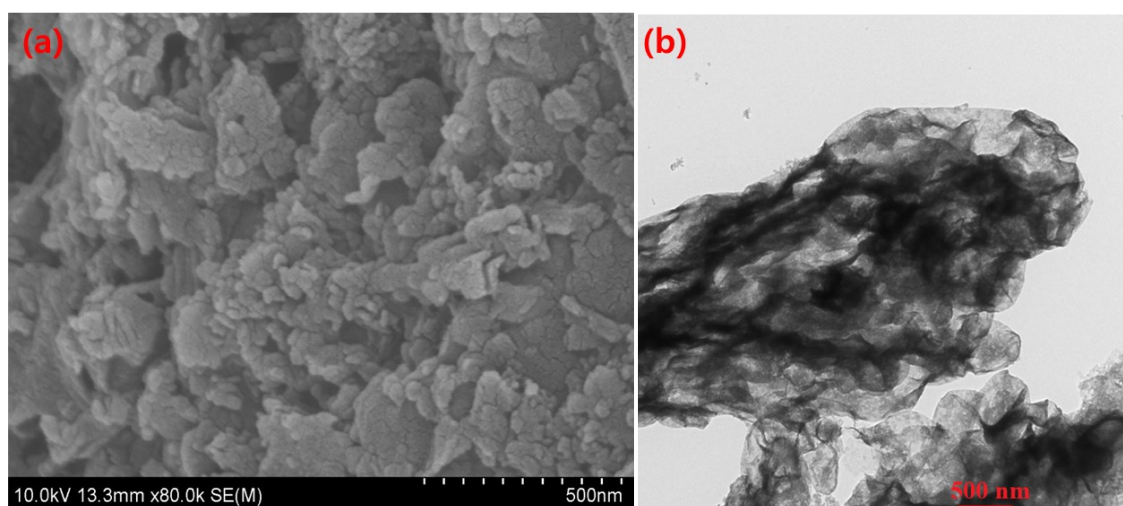

Figure S6. (a) FE-SEM and (b) TEM images of g-C<sub>3</sub>N<sub>4</sub> (CN-U) derived from urea precursor

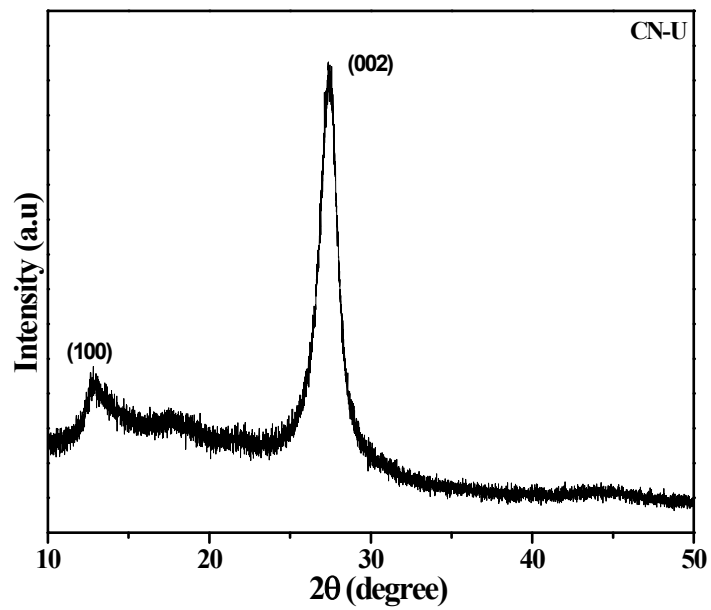

Figure S7. Powder XRD patterns of g-C<sub>3</sub>N<sub>4</sub> (CN-U) derived from urea precursor

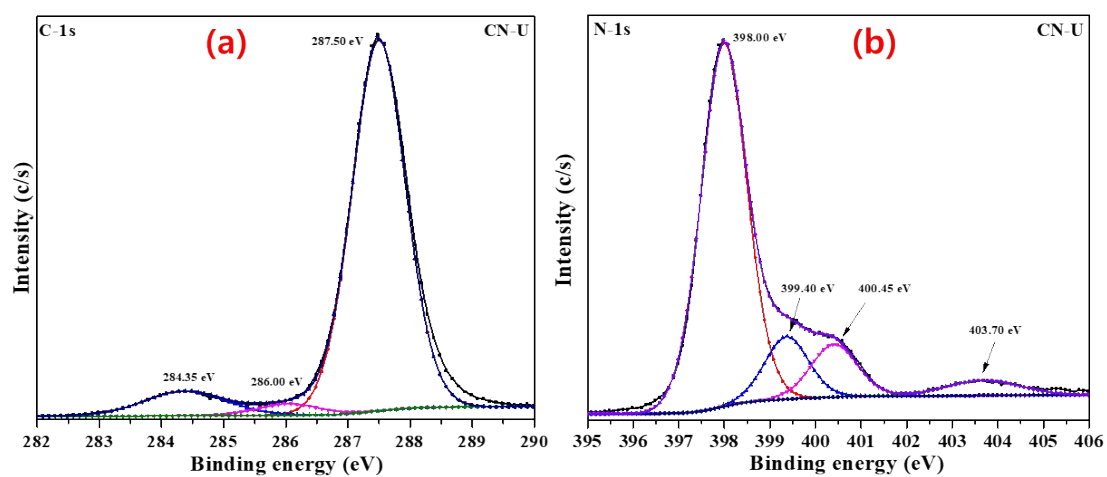

Figure S8. High resolution XPS spectra of (a) C-1s and (b) N-1s in CN-U sample

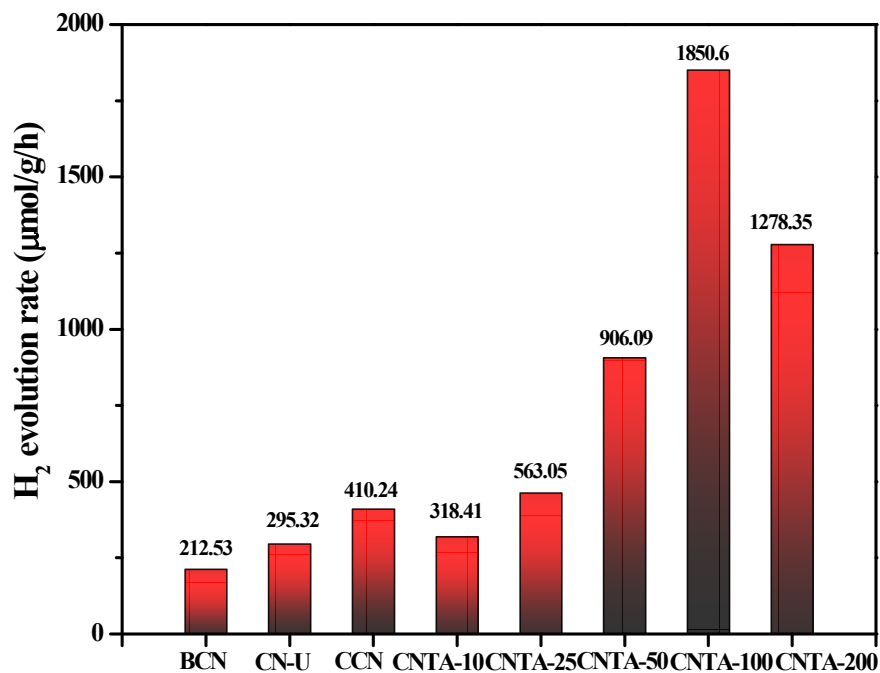

Figure S9. Photocatalytic H<sub>2</sub> evolution activity of BCN, CN-U, CCN and CNTA samples.

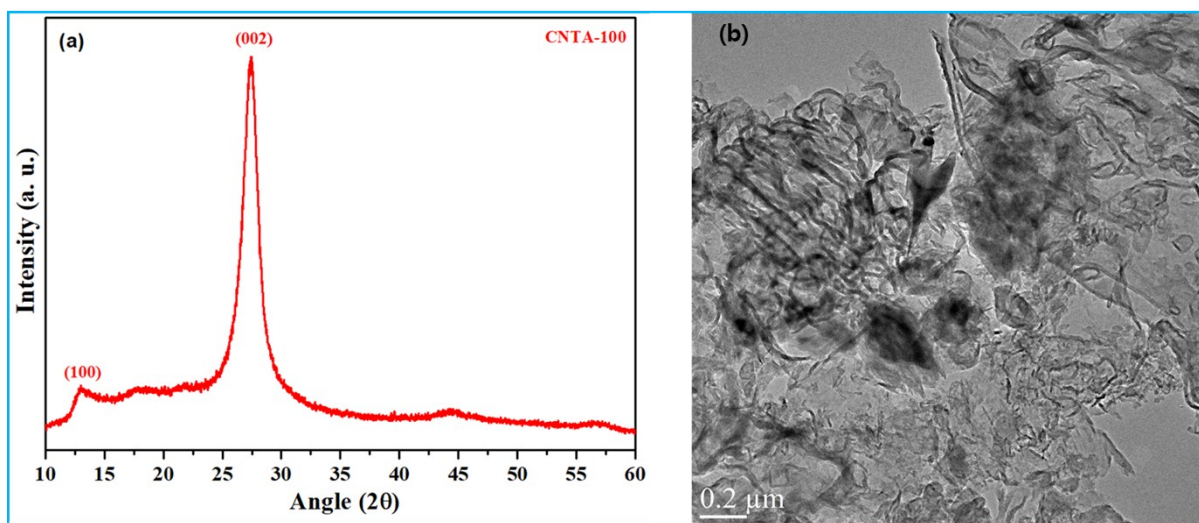

Fig. S10. Powder X-ray diffraction patterns and TEM image of the CNTA-100 photocatalyst sample after cycling experiments of photocatalytic TC degradation reaction.

**Table S5.** Parameters derived from the fitting of decay profile of BCN and CNTA-100 photocatalyst samples using a bi-exponential fitting decay equation.

| <b>sample</b> | <b><math>\tau_1</math>(ns)</b> | <b><math>A_1</math>(%)</b> | <b><math>\tau_2</math>(ns)</b> | <b><math>A_2</math>(%)</b> | <b><math>\tau_{avg}</math></b> |
|---------------|--------------------------------|----------------------------|--------------------------------|----------------------------|--------------------------------|
| BCN           | 3.9                            | 4                          | 94                             | 0.0516                     | 18                             |
| CNTA-100      | 3.6                            | 4.2                        | 91                             | 0.0463                     | 16                             |

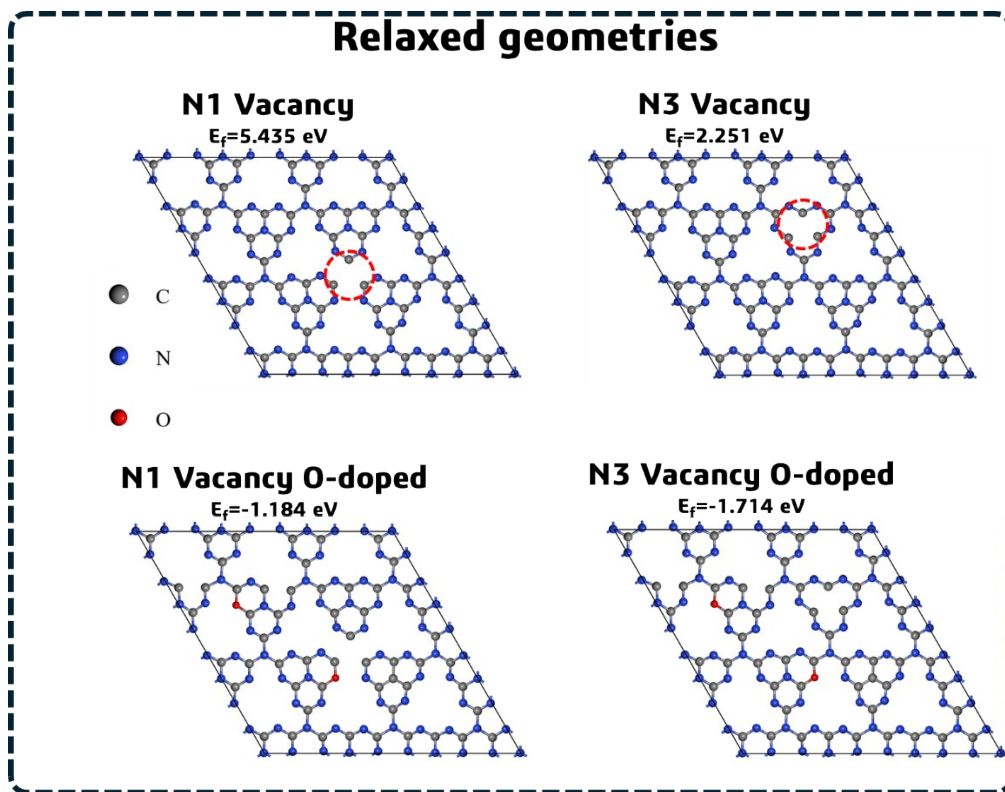

**Fig. S11** Optimized atomic configurations of defective (N1 and N2) and oxygen-stabilized  $g\text{-C}_3\text{N}_4$  (N14 and N2) derived from DFT computations. representative nitrogen vacancy sites (shown by red dashed circles), demonstrating various local coordination settings within the heptazine framework.  $E_f$  indicates the formation energy of the N vacancy and O-doping.

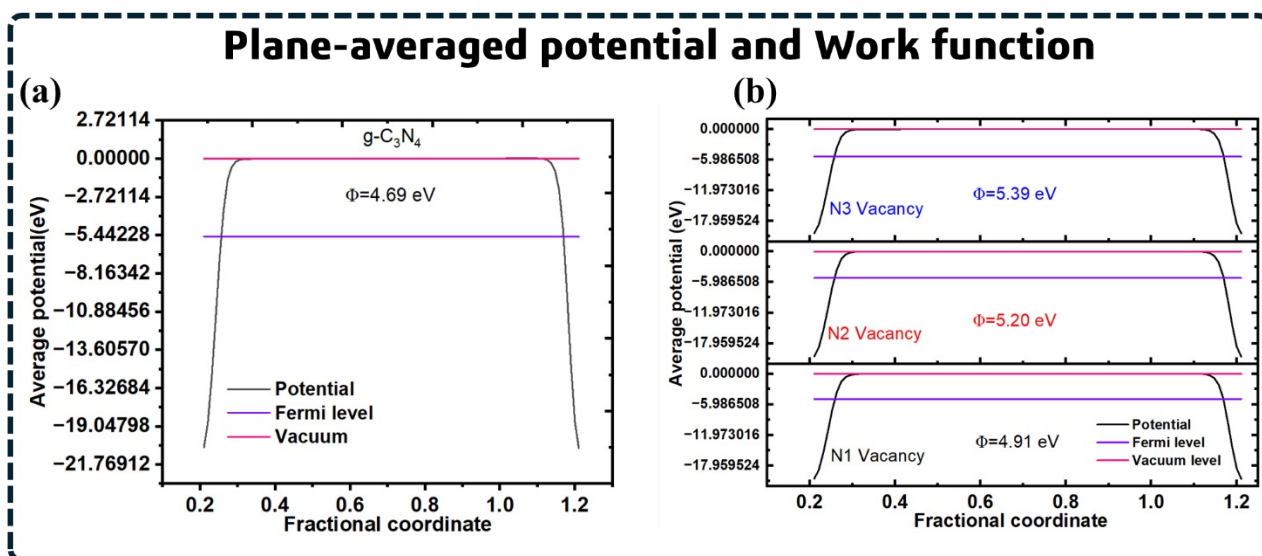

**Fig. S12** Planar-averaged electrostatic potential profiles utilized to determine the work function of  $g\text{-C}_3\text{N}_4$  and nitrogen-vacancy-containing structures. (a) Pristine  $g\text{-C}_3\text{N}_4$  has a work function of 4.69 eV, derived from the energy disparity between the vacuum level and the Fermi level. (b) Work-function estimates for  $g\text{-C}_3\text{N}_4$  with nitrogen vacancies N1, N2, and N3, demonstrating vacancy-induced alterations in the surface electronic potential.

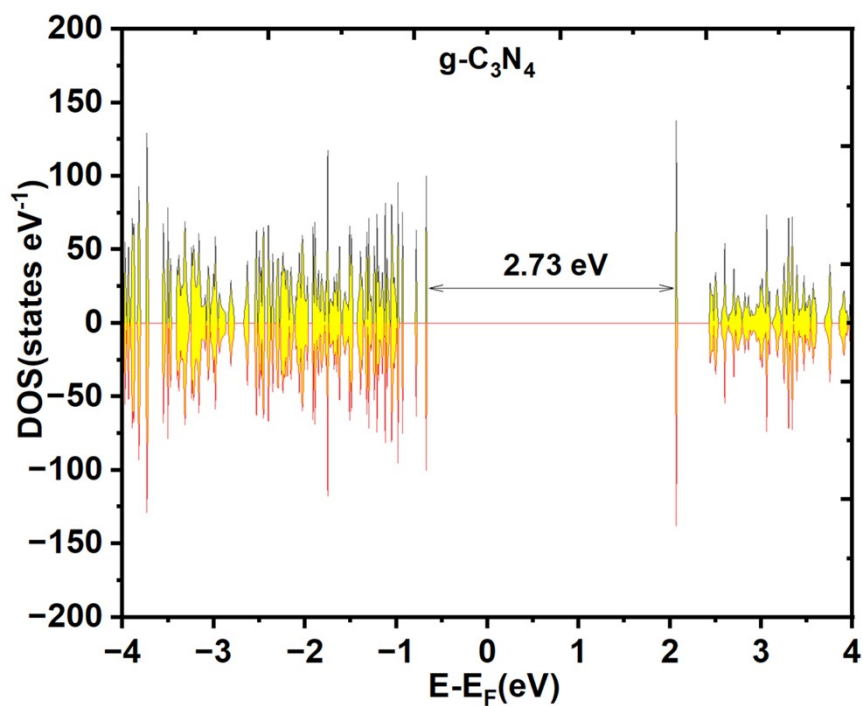

**Fig. S13** Total density of states (TDOS) of pristine g-C<sub>3</sub>N<sub>4</sub> calculated using density functional theory. The Fermi level is set to 0 eV in order to distinguish the conduction band minimum (CBM) and valence band maximum (VBM). Pristine g-C<sub>3</sub>N<sub>4</sub> exhibits a clear semiconducting behavior with an electronic bandgap of **2.73 eV**, consistent with its intrinsic electronic structure and limited visible-light absorption.

## References

- [1] Yu Zhang, Jingde Luan, Panpan Li, Longde Jiang, Haibin Yan, Wengang Liu, *et al.*, Carbon doping and bridging oxygen benefit for g-C<sub>3</sub>N<sub>4</sub> to photocatalytic H<sub>2</sub> production from methanol/water splitting: Experiments and theoretical calculations, *Carbon* 228 (2024) 119430.
- [2] X. –J. Lu, L. Xu, I. Ullah, H. –B. Li, A. –W. Xu, Sulfur-doped g-C<sub>3</sub>N<sub>4</sub> photocatalyst for significantly steered visible light photocatalytic H<sub>2</sub> evolution from water splitting, *Catal. Sci. Technol.* 14 (2024) 606-614.
- [3] Zhili Xu, Jing Li, Deyi Zhan, Yue Liu, Weihong Xu, Junfeng Wang, Zhiwu Yu, The n– $\pi^*$  electronic transition induced by nitrogen vacancies enhances, photocatalytic hydrogen production in carbon nitride, *Chem. Eng. J.* 501 (2024) 157670.
- [4] Yabin Jiang, Shaofan Fang, Chi Cao, Enna Hong, Lei Zeng, Wensheng Yang, Limin Huang, Chunzhen Yang, Enhanced light harvesting and charge separation of carbon and oxygen co-doped carbon nitride as excellent photocatalyst for hydrogen evolution reaction, *J. Colloids Interface Sci.* 2022, 612, 367-376.
- [5] Jun Hu, Hongyin Liu, Chun Sun, Lixu Wu, and Feipeng Jiao, Precise Defect Engineering with Ultrathin Porous Frameworks on g-C<sub>3</sub>N<sub>4</sub> for Synergetic Boosted Photocatalytic Hydrogen Evolution, *Ind. Eng. Chem. Res.* 63 (2024) 2665–2675.
- [6] Yanping Liu, Wen Yin, Qingyun Lin, Zhigang Li, Wenwu Zhong, Baizeng Fang, Nitrogen vacancies-engineered graphitic carbon nitride nanosheets for boosting photocatalytic H<sub>2</sub> production, *Applied Surface Science* 640 (2023) 158386.
- [7] Bin Wang, Hairui Cai, Daming Zhao, Miao Song, Penghui Guo, Shaohua Shen, Dongsheng Li, Shengchun Yang, Enhanced photocatalytic hydrogen evolution by partially replaced corner-site C atom with P in g-C<sub>3</sub>N<sub>4</sub>, *Applied Catalysis B: Environmental* 244 (2019) 486–493.
- [8] Zhili Xu, Jing Li, Deyi Zhan, Yue Liu, Weihong Xu, Junfeng Wang, Zhiwu Yu, The n– $\pi^*$  electronic transition induced by nitrogen vacancies enhances photocatalytic hydrogen production in carbon nitride, *Chemical Engineering Journal* 501 (2024) 157670.
- [9] Yongkang Quan, Ruidong Li, Xingzhou Li, Rongxing Chen, Yun Hau Ng, Jianying Huang, Jun Hu, Yuekun Lai, S-modified Graphitic Carbon Nitride With Double Defect Sites For Efficient Photocatalytic Hydrogen Evolution, *Small* 2024, 20, 2406576

- [10] Yaxi Tian, Danni Zeng, Tingzhe Shen, Rongfeng Guan, Wenyan Shi, One-step synthesis of S-doped C-vacancy g-C<sub>3</sub>N<sub>4</sub> with honeycomb porous nanosheets structure for efficient visible-light-driven hydrogen evolution, *Fuel* 357 (2024) 129927.
- [11] Chun-Feng Li, Yong-Fei Ji, Qiu-Yu Wei, Zhen-Bang Liu, Yun-Yun Wu, Li-Si Chen, Dong-Xue Han, Li Niu, Chun-Lan Tao, Dong-Dong Qin, Defect and Electronic Structure Engineering Graphitic Carbon Nitride with Dual-Gas-Phase Reaction for Visible-Light-Driven Hydrogen Evolution, *ACS APpl. Energy Mater.* 2023, 6, 997-1007.
- [12] Hao Chen, Wuyou Wang, Zhenzhen Yang, Xian Suo, Ziyang Lu, Weiming Xiao and Sheng Dai, Alkaline salt-promoted construction of hydrophilic and nitrogen deficient graphitic carbon nitride with highly improved photocatalytic efficiency, *J. Mater. Chem. A* 2021, 9, 4700-4706
- [13] Yongkang Quan, Jianna Li, Xingzhou Li, Rongxing Chen, Yingzhen Zhang, Jianying Huang, Jun Hu, Yuekun Lai, Molten salt-assisted synthesis of carbon nitride with defective sites as visible-light photocatalyst for highly efficient hydrogen evolution, *Applied Catalysis B: Environment and Energy* 362 (2025) 124711
- [14] Bin Yang, Jun Han, Qian Zhang, Guangfu Liao, Wenjin Cheng, Guixian Ge, Jichang Liu, Xiaodong Yang, Rongjie Wang, Xin Jia, Carbon defective g-C<sub>3</sub>N<sub>4</sub> thin-wall tubes for drastic improvement of photocatalytic H<sub>2</sub> production, *Carbon* 2023, 202,348-357.
- [15] Xiang Xia, Cong Xie, Baogang Xu, Xingshuai Ji, Guanggang Gao, Ping Yang, Role of B-doping in g-C<sub>3</sub>N<sub>4</sub> nanosheets for enhanced photocatalytic NO removal and H<sub>2</sub> generation, *J. Ind. Eng. Chem.* 2022, 105, 303-312.
- [16] Lee-Lee Chang, Chechia Hu, Chun-Yao Wang, Wen-Ling Chen, Kanta Yamada, An-Yu Wu, Masaaki Yoshida, Szu-Chia Chien, Kuo-Lun Tung, Synergistic effects of carbon and nitrogen vacancies in carbon nitride for photocatalytic H<sub>2</sub> production and tetracycline oxidation, *Separation Purification Tech.* 2025, 354, 129346.
- [17] Linjie Fan, Yixun Cao, Yushuai Jia, Ruolan Zhu, Deji Zhang, Xin Liu, Surface nitrogen defect modified crystalline carbon nitride spheres with boosted carrier dynamics for efficient solar hydrogen production, *Separation Purification Tech.* 2025, 354, 129254.
- [18] Ji Wu1, Zhonghuan Liu, Xinyu Lin, Enhui Jiang, Shuai Zhang, Pengwei Huo, Yan Yan, Peng Zhou, Yongsheng Yan, Breaking through water-splitting bottlenecks over carbon nitride with fluorination, *Nat. Commun.* 2022, 13, 6999.

- [19] Qinqin Liua, Jiyou Shena, Xiaohui Yua, Xiaofei Yangb, Wei Liua, Juan Yanga, Hua Tang, Hui Xu, Huaming Li, Youyong Li, Jingsan Xu, Unveiling the origin of boosted photocatalytic hydrogen evolution in simultaneously (S, P, O)-Codoped and exfoliated ultrathin g-C<sub>3</sub>N<sub>4</sub> nanosheets, *Appl. Catal. B.*, 2019, 248, 84–94.
- [20] Hao Yuan, Haoran Sun, Yuxing Shi, Jiaxuan Wang, Ang Bian, Youyou Hu, Feng Guo, Weilong Shi, Xin Du, Zhenhui Kang, Cooperation of carbon doping and carbon loading boosts photocatalytic activity by the optimum photo-induced electron trapping and interfacial charge transfer, *Chem. Eng. J.* 2023, 472, 144654.
